# Supplementary material
Source: PubMed Central journal article supplement (PMC2854429)
Supplement: blood-2009-03-211045_1.pdf [file blood-2009-03-211045_1.pdf]

| <b>GENE NAME</b>                             | <b>SINGLE VARIATE</b> | <b>CO-VARIATE</b> | <b>TWO-GENE</b> |
|----------------------------------------------|-----------------------|-------------------|-----------------|
| ARF1 (ADP-ribosylation factor 1)             | 0.18                  | 0.18              | <b>0.05</b>     |
| ARF1 (ADP-ribosylation factor 1)             | 0.16                  | 0.54              | <b>0.04</b>     |
| ARFP1 (ADP-ribosylation factor 1)            | 0.89                  | 0.54              | 0.29            |
| ARF3 (ADP-ribosylation factor 3)             | 0.06                  | <b>0.003</b>      | <b>0.03</b>     |
| ARF3 (ADP-ribosylation factor 3)             | 0.97                  | 0.1               | 0.25            |
| ARF3 (ADP-ribosylation factor 3)             | 0.16                  | 0.28              | <b>0.04</b>     |
| ARF5 (ADP-ribosylation factor 5)             | <b>0.000097</b>       | <b>0.003</b>      | <b>0.003</b>    |
| PCGF2 (Polycomb group finger 2)              | 0.3                   | <b>0.04</b>       | 0.98            |
| PCGF2 (Polycomb group finger 2)              | 0.75                  | 0.18              | 0.33            |
| PCGF2 (Polycomb group finger 2)              | 0.67                  | 0.54              | 0.18            |
| PCGF2 (Polycomb group finger 2)              | 0.07                  | 0.4               | 0.94            |
| PIAS1 (Protein inhibitor of activated STAT1) | 0.21                  | 0.9               | 0.65            |
| PIAS1 (Protein inhibitor of activated STAT1) | 0.06                  | 0.003             | 0.93            |
| PIAS1 (Protein inhibitor of activated STAT1) | 0.69                  | 0.72              | 0.24            |
| PIAS1 (Protein inhibitor of activated STAT1) | 0.12                  | <b>0.04</b>       | <b>0.01</b>     |
| RANBP2 (RAN binding protein 2)               | 0.37                  | 0.95              | 0.15            |
| RANBP2 (RAN binding protein 2)               | 0.87                  | <b>0.007</b>      | 0.21            |
| RANBP2 (RAN binding protein 2)               | 0.68                  | 0.77              | 0.22            |
| UBE2I (UBC9 Homolog)                         | 0.07                  | 0.1               | 0.89            |
| UBE2I (UBC9 Homolog)                         | 0.89                  | 0.94              | 0.33            |
| UBE2I (UBC9 Homolog)                         | 0.08                  | 0.97              | 0.08            |
| UBE2I (UBC9 Homolog)                         | 0.24                  | 0.45              | 0.69            |
